# Supplementary material for: Development of a Semi-Quantitative Food Frequency Questionnaire to Assess the Dietary Intake of a Multi-Ethnic Urban Asian Population
Source: MDPI journal article supplement (doi:10.3390/nu8090528), 2016-08-27
Supplement: s1 [file s1]

## Food Frequency Questionnaire

This questionnaire asks about foods eaten over the past year.

Participants responses should be the number of times either 'per day', 'per week', or 'per month'.

### BREAD AND BREAD SPREADS

How often do you consume one serving of:

|   |                                                                                                 | per day | per week | per month | Never/Rarely             |
|---|-------------------------------------------------------------------------------------------------|---------|----------|-----------|--------------------------|
| 1 | White bread (inc. naan)                                                                         |         |          |           | <input type="checkbox"/> |
| 2 | Wholemeal bread                                                                                 |         |          |           | <input type="checkbox"/> |
| 3 | Bread with dried fruit/nuts/seeds<br>e.g. walnut bread, raisin bread, corn<br>bread, multigrain |         |          |           | <input type="checkbox"/> |

One serving means:

|          |
|----------|
| 2 slices |
| 2 slices |
| 2 slices |

|   |                                      |  |  |  |                          |
|---|--------------------------------------|--|--|--|--------------------------|
| 4 | Margarine e.g. olive spread, Planta® |  |  |  | <input type="checkbox"/> |
| 5 | Butter                               |  |  |  | <input type="checkbox"/> |
| 6 | Kaya                                 |  |  |  | <input type="checkbox"/> |
| 7 | Peanut butter                        |  |  |  | <input type="checkbox"/> |
| 8 | Jam/Marmalade/Honey                  |  |  |  | <input type="checkbox"/> |
| 9 | Chocolate spread e.g. Nutella®       |  |  |  | <input type="checkbox"/> |

|            |
|------------|
| 1 teaspoon |

|    |                                                                            |  |  |  |                          |
|----|----------------------------------------------------------------------------|--|--|--|--------------------------|
| 10 | French toast                                                               |  |  |  | <input type="checkbox"/> |
| 11 | Pizza                                                                      |  |  |  | <input type="checkbox"/> |
| 12 | Thosai, plain or with filling<br>e.g. potato                               |  |  |  | <input type="checkbox"/> |
| 13 | Roti prata, plain or with egg/cheese<br>(inc. paratha)                     |  |  |  | <input type="checkbox"/> |
| 14 | Chapati                                                                    |  |  |  | <input type="checkbox"/> |
| 15 | Murtabak                                                                   |  |  |  | <input type="checkbox"/> |
| 16 | Puri (deep-fried Indian bread)                                             |  |  |  | <input type="checkbox"/> |
| 17 | Sweet filled buns (inc. pau)<br>e.g. red bean, coconut, custard            |  |  |  | <input type="checkbox"/> |
| 18 | Savoury filled buns (inc. pau)<br>e.g. chicken, char siew, cheese, hot dog |  |  |  | <input type="checkbox"/> |

|                                 |
|---------------------------------|
| 2 triangular slices             |
| 1 slice<br>(from 14" pizza)     |
| 1 piece                         |
| 1 piece                         |
| 1 piece                         |
| ¼ of a whole/<br>2 small pieces |
| 1 piece                         |
| 1 piece                         |
| 1 piece                         |

**RICE**

*How often do you consume one serving of:*

|           |                                                            | Per day | Per week | Per month | Never/Rarely             | One serving means: |
|-----------|------------------------------------------------------------|---------|----------|-----------|--------------------------|--------------------|
| <b>19</b> | <b>Rice, plain, boiled/steamed</b><br>(excluding porridge) |         |          |           | <input type="checkbox"/> | 1 rice bowl        |

*How often is the rice:*

|            |                                       | Never/Rarely             | Sometimes                | Half the time            | Mostly                   | Always                   |
|------------|---------------------------------------|--------------------------|--------------------------|--------------------------|--------------------------|--------------------------|
| <b>19a</b> | <b>Mixture of white and brown/red</b> | <input type="checkbox"/> |
| <b>19b</b> | <b>Brown or red rice (unpolished)</b> | <input type="checkbox"/> |
| <b>19c</b> | <b>White rice (inc. basmati)</b>      | <input type="checkbox"/> |

*How often do you consume one serving of:*

|           |                                                                                                | Per day | Per week | Per month | Never/Rarely             | One serving means:                       |
|-----------|------------------------------------------------------------------------------------------------|---------|----------|-----------|--------------------------|------------------------------------------|
| <b>20</b> | <b>Rice porridge, flavoured, (exc. plain)</b><br>e.g. chicken, pork, duck, fish,<br>vegetarian |         |          |           | <input type="checkbox"/> | 1 medium bowl/<br>1 soup bowl(half full) |

*How often is the porridge made with:*

|            |                                       | Never/Rarely             | Sometimes                | Half the time            | Mostly                   | Always                   |
|------------|---------------------------------------|--------------------------|--------------------------|--------------------------|--------------------------|--------------------------|
| <b>20a</b> | <b>Mixture of white and brown/red</b> | <input type="checkbox"/> |
| <b>20b</b> | <b>Brown or red rice (unpolished)</b> | <input type="checkbox"/> |
| <b>20c</b> | <b>White rice</b>                     | <input type="checkbox"/> |

*How often do you consume one serving of:*

|           |                             | Per day | Per week | Per month | Never/Rarely             | One serving means: |
|-----------|-----------------------------|---------|----------|-----------|--------------------------|--------------------|
| <b>21</b> | <b>Rice porridge, plain</b> |         |          |           | <input type="checkbox"/> | 1 medium bowl      |

*How often is the porridge made with:*

|            |                                       | Never/Rarely             | Sometimes                | Half the time            | Mostly                   | Always                   |
|------------|---------------------------------------|--------------------------|--------------------------|--------------------------|--------------------------|--------------------------|
| <b>21a</b> | <b>Mixture of white and brown/red</b> | <input type="checkbox"/> |
| <b>21b</b> | <b>Brown or red rice (unpolished)</b> | <input type="checkbox"/> |
| <b>21c</b> | <b>White rice</b>                     | <input type="checkbox"/> |

| How often do you consume one serving of: |            | Per day | Per week | Per month | Never/Rarely             | One serving means: |
|------------------------------------------|------------|---------|----------|-----------|--------------------------|--------------------|
| 22                                       | Fried rice |         |          |           | <input type="checkbox"/> | 1 plate            |

How often is the fried rice with:

|     |                 | Never/Rarely             | Sometimes                | Half the time            | Mostly                   | Always                   |
|-----|-----------------|--------------------------|--------------------------|--------------------------|--------------------------|--------------------------|
| 22a | With vegetables | <input type="checkbox"/> |

How often is the fried rice made with:

|     |                                | Never/Rarely             | Sometimes                | Half the time            | Mostly                   | Always                   |
|-----|--------------------------------|--------------------------|--------------------------|--------------------------|--------------------------|--------------------------|
| 22b | Mixture of white and brown/red | <input type="checkbox"/> |
| 22c | Brown or red rice (unpolished) | <input type="checkbox"/> |
| 22d | White rice                     | <input type="checkbox"/> |

How often is the fried rice prepared:

|     |                | Never/Rarely             | Sometimes                | Half the time            | Mostly                   | Always                   |
|-----|----------------|--------------------------|--------------------------|--------------------------|--------------------------|--------------------------|
| 22e | At home        | <input type="checkbox"/> |
| 22f | By food outlet | <input type="checkbox"/> |

| How often do you consume one serving of: |                                                                                                                                              | Per day | Per week | Per month | Never/Rarely             | One serving means:      |
|------------------------------------------|----------------------------------------------------------------------------------------------------------------------------------------------|---------|----------|-----------|--------------------------|-------------------------|
| 23                                       | <b>Flavoured rice</b><br>Chicken rice, briyani, nasi lemak, pilau, nasi minyak, yellow rice, olive rice, tomato rice, saffron rice, yam rice |         |          |           | <input type="checkbox"/> | 1 rice bowl             |
| 24                                       | <b>Flavoured rice dish (mixed with meat/veg)</b> e.g. bi bim bap, claypot, mui fan, fan choy                                                 |         |          |           | <input type="checkbox"/> | 1 medium bowl           |
| 25                                       | <b>Glutinous rice</b><br>e.g. lor mai kai, bak chang                                                                                         |         |          |           | <input type="checkbox"/> | 1 rice bowl,<br>1 piece |
| 26                                       | <b>Lontong</b>                                                                                                                               |         |          |           | <input type="checkbox"/> | 4 pieces                |
| 27                                       | <b>Idli (steamed rice cake, savoury)</b>                                                                                                     |         |          |           | <input type="checkbox"/> | 2 pieces                |
| 28                                       | <b>Rice roll</b><br>e.g chwee kway, chee cheong fun                                                                                          |         |          |           | <input type="checkbox"/> | 1 piece                 |

**GRAVY**

How often do you consume one serving of:

|           |                                                                                                                  | Per day | Per week | Per month | Never/Rarely             | One serving means: |
|-----------|------------------------------------------------------------------------------------------------------------------|---------|----------|-----------|--------------------------|--------------------|
| <b>29</b> | <b>Gravy, with coconut</b><br>( <u>extra</u> on top of rice or as a side dish)<br>e.g. curry gravy               |         |          |           | <input type="checkbox"/> | 1 scoop            |
| <b>30</b> | <b>Gravy, without coconut</b><br>( <u>extra</u> on top of rice or as a side dish)<br>e.g. braised gravy, sambhar |         |          |           | <input type="checkbox"/> | 1 scoop            |

**NOODLES**

How often do you consume one serving of:

|           |                                                                                                                         | Per day | Per week | Per month | Never/Rarely             | One serving means: |
|-----------|-------------------------------------------------------------------------------------------------------------------------|---------|----------|-----------|--------------------------|--------------------|
| <b>31</b> | <b>Noodles, fried</b> e.g. mee goreng, Hokkien mee, hor fun                                                             |         |          |           | <input type="checkbox"/> | 1 plate            |
| <b>32</b> | <b>Noodles, in gravy</b> e.g. laksa, mee rebus, mee siam, lor mee, curry noodles                                        |         |          |           | <input type="checkbox"/> | 1 medium bowl      |
| <b>33</b> | <b>Noodles, in soup</b> e.g. yong tau foo, mee soto, ramen, instant noodle soup, fishball noodles, sliced fish bee hoon |         |          |           | <input type="checkbox"/> | 1 medium bowl      |
| <b>34</b> | <b>Noodles, dry</b> e.g. instant, dry wanton noodles, fishball noodles, mincemeat and mushroom noodles                  |         |          |           | <input type="checkbox"/> | 1 medium bowl      |

How often are the noodles:

|            |                                                                                                                                                 | Never/Rarely             | Sometimes                | Half the time            | Mostly                   | Always                   |
|------------|-------------------------------------------------------------------------------------------------------------------------------------------------|--------------------------|--------------------------|--------------------------|--------------------------|--------------------------|
| <b>34a</b> | <b>White rice noodles</b> e.g. bee hoon, kway teow, mee tai mak                                                                                 | <input type="checkbox"/> |
| <b>34b</b> | <b>Brown rice noodles</b> e.g. brown rice bee hoon                                                                                              | <input type="checkbox"/> |
| <b>34c</b> | <b>Wheat noodles</b> e.g. yellow noodles, ban mian, mee hoon kueh, you-mian, sheng mien, yee mien, mee pok, mee kia, mee sua, ramen, soba, udon | <input type="checkbox"/> |
| <b>34d</b> | <b>Instant noodles</b>                                                                                                                          | <input type="checkbox"/> |

How often are the noodles prepared:

|            |                       | Never/Rarely             | Sometimes                | Half the time            | Mostly                   | Always                   |
|------------|-----------------------|--------------------------|--------------------------|--------------------------|--------------------------|--------------------------|
| <b>34e</b> | <b>At home</b>        | <input type="checkbox"/> |
| <b>34f</b> | <b>By food outlet</b> | <input type="checkbox"/> |

**PASTA***How often do you consume one serving of:*

|    |                                                                        | Per day | Per week | Per month | Never/Rarely             | One serving means: |
|----|------------------------------------------------------------------------|---------|----------|-----------|--------------------------|--------------------|
| 35 | <b>Pasta, plain (without meat/fish/seafood/veg)</b><br>e.g. aglio olio |         |          |           | <input type="checkbox"/> | 1 plate            |
| 36 | <b>Pasta, with meat/fish/seafood/veg</b>                               |         |          |           | <input type="checkbox"/> | 1 plate            |

*How often is the pasta:*

|     |                                                      | Never/Rarely             | Sometimes                | Half the time            | Mostly                   | Always                   |
|-----|------------------------------------------------------|--------------------------|--------------------------|--------------------------|--------------------------|--------------------------|
| 36a | <b>Wholemeal</b><br>(brownier colour, rough texture) | <input type="checkbox"/> |

*How often is the pasta made with:*

|     |                                       | Never/Rarely             | Sometimes                | Half the time            | Mostly                   | Always                   |
|-----|---------------------------------------|--------------------------|--------------------------|--------------------------|--------------------------|--------------------------|
| 36b | <b>Tomato sauce</b>                   | <input type="checkbox"/> |
| 36c | <b>Creamy sauce</b> e.g. cheese sauce | <input type="checkbox"/> |
| 36d | <b>Without any sauce</b>              | <input type="checkbox"/> |

**FRENCH FRIES***How often do you consume one serving of:*

|    |                                                | Per day | Per week | Per month | Never/Rarely             | One serving means: |
|----|------------------------------------------------|---------|----------|-----------|--------------------------|--------------------|
| 37 | <b>French fries</b> (inc. wedges, crinkle cut) |         |          |           | <input type="checkbox"/> | 1 regular serving  |

**BREAKFAST CEREAL***How often do you consume one serving of:*

|     |                                                                     | Per day | Per week | Per month | Never/Rarely             | One serving means:                    |
|-----|---------------------------------------------------------------------|---------|----------|-----------|--------------------------|---------------------------------------|
| 38  | <b>Oats</b> e.g. rolled oats, instant                               |         |          |           | <input type="checkbox"/> | 1 medium bowl                         |
| 39  | <b>3-in-1 cereal</b> e.g. Nutremill®, Nestum®                       |         |          |           | <input type="checkbox"/> | 1 cup                                 |
| 40  | <b>Other breakfast cereal</b><br><b>PLEASE STATE BRAND AND TYPE</b> |         |          |           |                          |                                       |
| 40a | _____                                                               |         |          |           | <input type="checkbox"/> | 1 medium bowl<br>(before adding milk) |
| 40b | _____                                                               |         |          |           | <input type="checkbox"/> | 1 medium bowl<br>(before adding milk) |

## POULTRY DISHES

How often do you consume one serving of:

Per day  
Per week  
Per month  
Never/Rarely

One serving means:

|    |                                                                                                                |  |  |  |                          |                                |
|----|----------------------------------------------------------------------------------------------------------------|--|--|--|--------------------------|--------------------------------|
| 41 | Chicken/turkey ham                                                                                             |  |  |  |                          | 4 slices ham                   |
| 42 | Processed chicken products<br>e.g. nugget, sausage, burger, hot dog                                            |  |  |  | <input type="checkbox"/> | 6 nuggets;<br>1 sausage/burger |
| 43 | Chicken/duck, fresh (not processed)<br>Including chicken from mixed dishes<br>such as chicken rice, nasi lemak |  |  |  | <input type="checkbox"/> | 1 palm-sized piece             |

|     |                                                     |
|-----|-----------------------------------------------------|
| 43a | How often do you remove the skin from chicken/duck: |
|-----|-----------------------------------------------------|

Never/Rarely  
Sometimes  
Half the time  
Mostly  
Always

How often do you consume chicken/duck:

|     |                          |
|-----|--------------------------|
| 43b | In curry with coconut    |
| 43c | In curry without coconut |
| 43d | Stir-fried/pan-fried     |
| 43e | Deep-fried               |
| 43f | Stewed/braised           |
| 43g | Roasted/grilled/baked    |
| 43h | Boiled/steamed/in soup   |

|                          |                          |                          |                          |                          |
|--------------------------|--------------------------|--------------------------|--------------------------|--------------------------|
| <input type="checkbox"/> |
| <input type="checkbox"/> |
| <input type="checkbox"/> |
| <input type="checkbox"/> |
| <input type="checkbox"/> |
| <input type="checkbox"/> |
| <input type="checkbox"/> |

How often do you consume chicken/duck prepared:

|     |                |
|-----|----------------|
| 43i | At home        |
| 43j | By food outlet |

|                          |                          |                          |                          |                          |
|--------------------------|--------------------------|--------------------------|--------------------------|--------------------------|
| <input type="checkbox"/> |
| <input type="checkbox"/> |

**FISH AND SEAFOOD DISHES***How often do you consume one serving of:*

|           |                                               | Per day | Per week | Per month | Never/Rarely             |
|-----------|-----------------------------------------------|---------|----------|-----------|--------------------------|
| <b>44</b> | <b>Raw fish/sashimi (no rice)</b>             |         |          |           | <input type="checkbox"/> |
| <b>45</b> | <b>Sushi roll/nigiri (includes rice)</b>      |         |          |           | <input type="checkbox"/> |
| <b>46</b> | <b>Salted fish/dried fish</b> e.g. ikan bilis |         |          |           | <input type="checkbox"/> |
| <b>47</b> | <b>Canned fish</b> e.g. tuna, sardines, dace  |         |          |           | <input type="checkbox"/> |

*One serving means:*

|                      |
|----------------------|
| 1 piece              |
| 3 pieces, 1 handroll |
| 1 dessertspoon       |
| 1 can (150g)         |

*Excluding the fish above, how often do you consume one serving of:*

|           |                                                                                                                                                        |  |  |  |                          |
|-----------|--------------------------------------------------------------------------------------------------------------------------------------------------------|--|--|--|--------------------------|
| <b>48</b> | <b>White fish</b> (dry and flaky)<br>e.g. pomfret, snapper, bream, catfish,<br>grouper, sea bass, stingray, kuning,<br>cod, dory, fish ball, fish cake |  |  |  | <input type="checkbox"/> |
| <b>49</b> | <b>Oily/fatty fish</b><br>(solid texture, darker colour)<br>eg. mackerel/kembong/batang/saba,<br>yellowtail trevally, salmon, sardine,<br>tuna         |  |  |  | <input type="checkbox"/> |
| <b>50</b> | <b>Prawns</b>                                                                                                                                          |  |  |  | <input type="checkbox"/> |
| <b>51</b> | <b>Crab</b>                                                                                                                                            |  |  |  | <input type="checkbox"/> |
| <b>52</b> | <b>Squid/sotong, cuttlefish, octopus,<br/>abalone</b>                                                                                                  |  |  |  | <input type="checkbox"/> |
| <b>53</b> | <b>Oysters/cockles/mussels/scallops</b>                                                                                                                |  |  |  | <input type="checkbox"/> |

|                                      |
|--------------------------------------|
| 1 fish fillet/<br>1 palm-sized piece |
| 1 fish fillet/<br>1 palm-sized piece |
| 1 scoop/<br>4 medium prawns          |
| half a small crab                    |
| 1 scoop                              |
| 1 scoop<br>(without shells)          |

*How often do you consume fish/seafood  
(e.g. fish, prawns, crab, sotong):*

|            |                                                                |
|------------|----------------------------------------------------------------|
| <b>53a</b> | <b>In curry with coconut</b>                                   |
| <b>53b</b> | <b>In curry without coconut</b><br>e.g. asam pedas, asam rebus |
| <b>53c</b> | <b>Stir-fried/pan-fried</b>                                    |
| <b>53d</b> | <b>Deep-fried</b>                                              |
| <b>53e</b> | <b>Stewed/braised</b>                                          |
| <b>53f</b> | <b>Roasted/grilled/baked</b>                                   |
| <b>53g</b> | <b>Boiled/steamed/in soup</b>                                  |

| Never/Rarely             | Sometimes                | Half the time            | Mostly                   | Always                   |
|--------------------------|--------------------------|--------------------------|--------------------------|--------------------------|
| <input type="checkbox"/> |
| <input type="checkbox"/> |
| <input type="checkbox"/> |
| <input type="checkbox"/> |
| <input type="checkbox"/> |
| <input type="checkbox"/> |
| <input type="checkbox"/> |

*How often do you consume fish/seafood prepared:*

|            |                       |
|------------|-----------------------|
| <b>53h</b> | <b>At home</b>        |
| <b>53i</b> | <b>By food outlet</b> |

|                          |                          |                          |                          |                          |
|--------------------------|--------------------------|--------------------------|--------------------------|--------------------------|
| <input type="checkbox"/> |
| <input type="checkbox"/> |

**MEAT DISHES***How often do you consume one serving of:*

Per day  
Per week  
Per month  
Never/Rarely

*One serving means:*

|    |                                                                              |  |  |  |                          |                                                            |
|----|------------------------------------------------------------------------------|--|--|--|--------------------------|------------------------------------------------------------|
| 54 | <b>Organ meat (spare parts)</b><br>e.g. liver, paru/lung, kidney, intestines |  |  |  | <input type="checkbox"/> | 1 scoop                                                    |
| 55 | <b>Cured pork products</b> e.g. bacon, ham, lap cheong, luncheon meat        |  |  |  | <input type="checkbox"/> | 1 sausage, 2 slices<br>bacon/ham; 1 slice<br>luncheon meat |
| 56 | <b>Pork, fresh</b>                                                           |  |  |  | <input type="checkbox"/> | 1 palm-sized piece                                         |
| 57 | <b>Beef burger</b> (inc. bread bun)                                          |  |  |  | <input type="checkbox"/> | 1 burger                                                   |
| 58 | <b>Beef, fresh</b> (excluding burgers)                                       |  |  |  | <input type="checkbox"/> | 1 palm-sized piece                                         |
| 59 | <b>Mutton/Lamb</b>                                                           |  |  |  | <input type="checkbox"/> | 1 palm-sized piece                                         |

|                                                                 |                                                                |                          |                          |                          |                          |                          |
|-----------------------------------------------------------------|----------------------------------------------------------------|--------------------------|--------------------------|--------------------------|--------------------------|--------------------------|
|                                                                 |                                                                | Never/Rarely             | Sometimes                | Half the time            | Mostly                   | Always                   |
| 59a                                                             | <b>How often is there visible fat on the meat you consume?</b> | <input type="checkbox"/> |
| <i>How often do you consume meat (e.g. beef, pork, mutton):</i> |                                                                |                          |                          |                          |                          |                          |
| 59b                                                             | <b>In curry with coconut</b>                                   | <input type="checkbox"/> |
| 59c                                                             | <b>In curry without coconut</b>                                | <input type="checkbox"/> |
| 59d                                                             | <b>Stir-fried/pan-fried</b>                                    | <input type="checkbox"/> |
| 59e                                                             | <b>Deep-fried</b>                                              | <input type="checkbox"/> |
| 59f                                                             | <b>Stewed/braised</b>                                          | <input type="checkbox"/> |
| 59g                                                             | <b>Roasted/grilled/baked</b>                                   | <input type="checkbox"/> |
| 59h                                                             | <b>Boiled/steamed/in soup</b>                                  | <input type="checkbox"/> |
| <i>How often do you consume meat prepared:</i>                  |                                                                |                          |                          |                          |                          |                          |
| 59i                                                             | <b>At home</b>                                                 | <input type="checkbox"/> |
| 59j                                                             | <b>By food outlet</b>                                          | <input type="checkbox"/> |



**EGG AND EGG DISHES**

How often do you consume one serving of:

Per day  
Per week  
Per month  
Never/Rarely

One serving means:

**Egg-based mixed dishes (egg is the main ingredient)**

e.g. omelette, steamed egg, scrambled egg with vegetables, chawanmushi

|    |                              |  |  |  |                          |                 |
|----|------------------------------|--|--|--|--------------------------|-----------------|
| 60 | containing <b>Pork</b>       |  |  |  | <input type="checkbox"/> | 1 scoop/1 piece |
| 61 | containing <b>Chicken</b>    |  |  |  | <input type="checkbox"/> | 1 scoop/1 piece |
| 62 | containing <b>Fish</b>       |  |  |  | <input type="checkbox"/> | 1 scoop/1 piece |
| 63 | containing <b>Beancurd</b>   |  |  |  | <input type="checkbox"/> | 1 scoop/1 piece |
| 64 | containing <b>Vegetables</b> |  |  |  | <input type="checkbox"/> | 1 scoop/1 piece |

How often do you consume egg dishes prepared:

Never/Rarely  
Sometimes  
Half the time  
Mostly  
Always

|     |                |                          |                          |                          |                          |                          |
|-----|----------------|--------------------------|--------------------------|--------------------------|--------------------------|--------------------------|
| 64a | At home        | <input type="checkbox"/> |
| 64b | By food outlet | <input type="checkbox"/> |

Excluding the egg above, how often do you consume one serving of:

Per day  
Per week  
Per month  
Never/Rarely

One serving means:

|    |                                 |  |  |  |                          |       |
|----|---------------------------------|--|--|--|--------------------------|-------|
| 65 | Egg, fried/scrambled/braised    |  |  |  | <input type="checkbox"/> | 1 egg |
| 66 | Egg, boiled/half-boiled/steamed |  |  |  | <input type="checkbox"/> | 1 egg |

**VEGETABLE DISHES**

How often do you consume one serving of:

Per day  
Per week  
Per month  
Never/Rarely

One serving means:

|    |                                      |  |  |  |                          |         |
|----|--------------------------------------|--|--|--|--------------------------|---------|
| 67 | Broccoli                             |  |  |  | <input type="checkbox"/> | 1 scoop |
| 68 | Chye sim/mustard greens/xiao bai cai |  |  |  | <input type="checkbox"/> | 1 scoop |
| 69 | Kailan                               |  |  |  | <input type="checkbox"/> | 1 scoop |
| 70 | Kang kong                            |  |  |  | <input type="checkbox"/> | 1 scoop |
| 71 | Spinach                              |  |  |  | <input type="checkbox"/> | 1 scoop |
| 72 | Cabbage, white                       |  |  |  | <input type="checkbox"/> | 1 scoop |
| 73 | Beansprouts                          |  |  |  | <input type="checkbox"/> | 1 scoop |
| 74 | Cauliflower                          |  |  |  | <input type="checkbox"/> | 1 scoop |

How often do you consume one serving of:

|    |                                                       | per day | per week | per month | Never/Rarely             | One serving means:           |
|----|-------------------------------------------------------|---------|----------|-----------|--------------------------|------------------------------|
| 75 | Eggplant/Brinjal                                      |         |          |           | <input type="checkbox"/> | 1 scoop                      |
| 76 | Gourd e.g. bitter, bottle, wax, wintermelon           |         |          |           | <input type="checkbox"/> | 1 scoop                      |
| 77 | Celery                                                |         |          |           | <input type="checkbox"/> | 1 scoop                      |
| 78 | Ladies fingers/okra                                   |         |          |           | <input type="checkbox"/> | 1 scoop                      |
| 79 | Mushrooms                                             |         |          |           | <input type="checkbox"/> | 1 scoop                      |
| 80 | Carrot                                                |         |          |           | <input type="checkbox"/> | 1 scoop                      |
| 81 | Capsicum/paprika                                      |         |          |           | <input type="checkbox"/> | 1 scoop                      |
| 82 | Dhal/lentils                                          |         |          |           | <input type="checkbox"/> | 1 scoop                      |
| 83 | Peas                                                  |         |          |           | <input type="checkbox"/> | 1 scoop                      |
| 84 | Long beans and french beans                           |         |          |           | <input type="checkbox"/> | 1 scoop                      |
| 85 | Other beans e.g. kidney bean, baked beans, chick peas |         |          |           | <input type="checkbox"/> | 1 scoop                      |
| 86 | Lotus root                                            |         |          |           | <input type="checkbox"/> | 1 scoop                      |
| 87 | Pumpkin                                               |         |          |           | <input type="checkbox"/> | 1 scoop                      |
| 88 | Soy beancurd/tofu/taukwa/taupok/tempeh                |         |          |           | <input type="checkbox"/> | 1/4 block(3cmx3cm) / 1 piece |
| 89 | Corn                                                  |         |          |           | <input type="checkbox"/> | 1 cup                        |
| 90 | Yam                                                   |         |          |           | <input type="checkbox"/> | 1 slice                      |
| 91 | Begedil (potato patty)                                |         |          |           | <input type="checkbox"/> | 1 piece                      |
| 92 | Potato (inc. mash) (excluding french fries)           |         |          |           | <input type="checkbox"/> | half a potato/1 cup          |

How often do you consume vegetables:

|     |                          | Never/Rarely             | Sometimes                | Half the time            | Mostly                   | Always                   |
|-----|--------------------------|--------------------------|--------------------------|--------------------------|--------------------------|--------------------------|
| 92a | In curry with coconut    | <input type="checkbox"/> |
| 92b | In curry without coconut | <input type="checkbox"/> |
| 92c | Stir-fried/pan-fried     | <input type="checkbox"/> |
| 92d | Deep-fried               | <input type="checkbox"/> |
| 92e | Stewed/braised           | <input type="checkbox"/> |
| 92f | Roasted/grilled/baked    | <input type="checkbox"/> |
| 92g | Boiled/steamed/in soup   | <input type="checkbox"/> |

How often do you consume vegetable dishes:

|     |                                    | Never/Rarely             | Sometimes                | Half the time            | Mostly                   | Always                   |
|-----|------------------------------------|--------------------------|--------------------------|--------------------------|--------------------------|--------------------------|
| 92h | containing <b>Pork</b>             | <input type="checkbox"/> |
| 92i | containing <b>Chicken</b>          | <input type="checkbox"/> |
| 92j | containing <b>Fish</b>             | <input type="checkbox"/> |
| 92k | containing <b>Beancurd</b>         | <input type="checkbox"/> |
| 92l | containing <b>Other vegetables</b> | <input type="checkbox"/> |

How often do you consume vegetable dishes prepared:

|     |                       |                          |                          |                          |                          |                          |
|-----|-----------------------|--------------------------|--------------------------|--------------------------|--------------------------|--------------------------|
| 92m | <b>At home</b>        | <input type="checkbox"/> |
| 92n | <b>By food outlet</b> | <input type="checkbox"/> |

How often do you consume one serving of:

|     |                                                                     | Per day                  | Per week                 | Per month                | Never/Rarely             | One serving means:                            |
|-----|---------------------------------------------------------------------|--------------------------|--------------------------|--------------------------|--------------------------|-----------------------------------------------|
| 93  | <b>Fried onion</b> e.g. onion rings, onion bhaji                    | <input type="checkbox"/> | <input type="checkbox"/> | <input type="checkbox"/> | <input type="checkbox"/> | 1 piece                                       |
| 94  | <b>Seaweed</b> e.g. in soup, in Korean/Japanese dishes, as a snack  | <input type="checkbox"/> | <input type="checkbox"/> | <input type="checkbox"/> | <input type="checkbox"/> | 3 strips/<br>1 dessertspoon                   |
| 95  | <b>Lettuce</b>                                                      | <input type="checkbox"/> | <input type="checkbox"/> | <input type="checkbox"/> | <input type="checkbox"/> | 4 medium leaves                               |
| 96  | <b>Coleslaw</b>                                                     | <input type="checkbox"/> | <input type="checkbox"/> | <input type="checkbox"/> | <input type="checkbox"/> | 1 dessertspoon                                |
| 97  | <b>Raita (yoghurt with cucumber)</b>                                | <input type="checkbox"/> | <input type="checkbox"/> | <input type="checkbox"/> | <input type="checkbox"/> | 2 dessertspoons                               |
| 98  | <b>Cucumber</b> (excluding in raita)                                | <input type="checkbox"/> | <input type="checkbox"/> | <input type="checkbox"/> | <input type="checkbox"/> | 3 slices                                      |
| 99  | <b>Tomato, raw</b>                                                  | <input type="checkbox"/> | <input type="checkbox"/> | <input type="checkbox"/> | <input type="checkbox"/> | half a medium<br>tomato;<br>5 cherry tomatoes |
| 100 | <b>Preserved vegetables</b> e.g. kimchi, dong cai, pickled cucumber | <input type="checkbox"/> | <input type="checkbox"/> | <input type="checkbox"/> | <input type="checkbox"/> | 1 dessertspoon                                |

**SALAD DRESSING**

How often do you consume one serving of:

|     |                                                                                               | Per day                  | Per week                 | Per month                | Never/Rarely             | One serving means: |
|-----|-----------------------------------------------------------------------------------------------|--------------------------|--------------------------|--------------------------|--------------------------|--------------------|
| 101 | <b>Salad dressing, cream based, low fat</b> e.g. thousand island, salad cream, mayonnaise     | <input type="checkbox"/> | <input type="checkbox"/> | <input type="checkbox"/> | <input type="checkbox"/> | 2 dessertspoons    |
| 102 | <b>Salad dressing, cream based, not low fat</b> e.g. thousand island, salad cream, mayonnaise | <input type="checkbox"/> | <input type="checkbox"/> | <input type="checkbox"/> | <input type="checkbox"/> | 2 dessertspoons    |
| 103 | <b>Salad dressing, oil-based</b> e.g. vinaigrette, olive oil                                  | <input type="checkbox"/> | <input type="checkbox"/> | <input type="checkbox"/> | <input type="checkbox"/> | 2 dessertspoons    |

**SOUP***How often do you consume one serving of:*

|     |                                                              | Per day | Per week | Per month | Never/Rarely             |
|-----|--------------------------------------------------------------|---------|----------|-----------|--------------------------|
| 104 | <b>Rasam (tamarind and tomato clear soup)</b>                |         |          |           | <input type="checkbox"/> |
| 105 | <b>Other clear soup</b> e.g. miso, kimchi soup, broth, stock |         |          |           | <input type="checkbox"/> |
| 106 | <b>Cream soup</b> e.g. cream of mushroom, cream of tomato    |         |          |           | <input type="checkbox"/> |

*One serving means:*

|               |
|---------------|
| 1 medium bowl |
| 1 medium bowl |
| 1 medium bowl |

**FRUIT***How often do you consume one serving of:*

|     |                                                                                      | Per day | Per week | Per month | Never/Rarely             |
|-----|--------------------------------------------------------------------------------------|---------|----------|-----------|--------------------------|
| 107 | <b>Apple</b>                                                                         |         |          |           | <input type="checkbox"/> |
| 108 | <b>Avocado</b>                                                                       |         |          |           | <input type="checkbox"/> |
| 109 | <b>Banana</b>                                                                        |         |          |           | <input type="checkbox"/> |
| 110 | <b>Blueberries</b>                                                                   |         |          |           | <input type="checkbox"/> |
| 111 | <b>Dragonfruit</b>                                                                   |         |          |           | <input type="checkbox"/> |
| 112 | <b>Durian</b>                                                                        |         |          |           | <input type="checkbox"/> |
| 113 | <b>Grape</b>                                                                         |         |          |           | <input type="checkbox"/> |
| 114 | <b>Guava</b>                                                                         |         |          |           | <input type="checkbox"/> |
| 115 | <b>Kiwi</b>                                                                          |         |          |           | <input type="checkbox"/> |
| 116 | <b>Mango</b>                                                                         |         |          |           | <input type="checkbox"/> |
| 117 | <b>Melon</b> e.g. honeydew, watermelon, rock melon                                   |         |          |           | <input type="checkbox"/> |
| 118 | <b>Orange</b>                                                                        |         |          |           | <input type="checkbox"/> |
| 119 | <b>Papaya</b>                                                                        |         |          |           | <input type="checkbox"/> |
| 120 | <b>Pear</b>                                                                          |         |          |           | <input type="checkbox"/> |
| 121 | <b>Pineapple</b>                                                                     |         |          |           | <input type="checkbox"/> |
| 122 | <b>Strawberries</b>                                                                  |         |          |           | <input type="checkbox"/> |
| 123 | <b>Dried fruit</b> e.g. raisins, dates, prunes (excluding in bread/breakfast cereal) |         |          |           | <input type="checkbox"/> |

*One serving means:*

|                                   |
|-----------------------------------|
| 1 small                           |
| half a fruit                      |
| 1 medium                          |
| 1 handful/<br>25 blueberries      |
| half a fruit                      |
| 1 seed                            |
| 1 handful/ 15 grapes              |
| half a fruit                      |
| 1 whole                           |
| 1 slice/ ½ a fruit                |
| 1 slice                           |
| 1 small                           |
| 1 slice                           |
| 1 small                           |
| 1 slice                           |
| 5 strawberries                    |
| 1 dessertspoon/<br>3 dates/prunes |

**BEVERAGES**

| How often do you consume one serving of: |                                                                         | Per day | Per week | Per month | Never/Rarely             | One serving means: |
|------------------------------------------|-------------------------------------------------------------------------|---------|----------|-----------|--------------------------|--------------------|
| <b>124</b>                               | <b>Coffee</b><br>(inc. home-made, coffee shop, gourmet e.g. cappuccino) |         |          |           | <input type="checkbox"/> | 1 cup              |

What type of milk do you usually add to coffee?

How much sugar do you usually add to coffee?

- 124a Sweetened condensed milk ☐
- 124b Evaporated milk ☐
- 124c Whole milk/powder ☐
- 124d Low-fat milk/powder ☐
- 124e Skimmed milk/powder ☐
- 124f Soya milk ☐
- 124g Creamer/whitener ☐
- 124h Milk is already added (I drink 3-in-1) ☐
- 124i Milk is already added (I drink 2-in-1) ☐
- 124j Do not add milk ☐

- 124k Less than 1 tsp ☐
- 124l 1-2 tsp/Ask for less ☐
- 124m 3-4 tsp/Ask for regular ☐
- 124n 5+ tsp/Ask for more ☐
- 124o None ☐

| How often do you consume one serving of: |                                             | Per day | Per week | Per month | Never/Rarely             | One serving means: |
|------------------------------------------|---------------------------------------------|---------|----------|-----------|--------------------------|--------------------|
| <b>125</b>                               | <b>Tea</b><br>(inc. home-made, coffee shop) |         |          |           | <input type="checkbox"/> | 1 cup              |

What type of milk do you usually add to tea?

How much sugar do you usually add to tea?

- 125a Sweetened condensed milk ☐
- 125b Evaporated milk ☐
- 125c Whole milk/powder ☐
- 125d Low-fat milk/powder ☐
- 125e Skimmed milk/powder ☐
- 125f Soya milk ☐
- 125g Creamer/whitener ☐
- 125h Milk is already added (I drink 3-in-1) ☐
- 125i Milk is already added (I drink 2-in-1) ☐
- 125j Do not add milk ☐

- 125k Less than 1 tsp ☐
- 125l 1-2 tsp/Ask for less ☐
- 125m 3-4 tsp/Ask for regular ☐
- 125n 5+ tsp/Ask for more ☐
- 125o None ☐

| How often do you consume one serving of: |                                                            | Per day | Per week | Per month | Never/Rarely             | One serving means: |
|------------------------------------------|------------------------------------------------------------|---------|----------|-----------|--------------------------|--------------------|
| 126                                      | <b>Malted drink/hot chocolate</b><br>e.g. Milo®, Ovaltine® |         |          |           | <input type="checkbox"/> | 1 cup/can/pack     |

What type of milk do you usually add to malted drinks?

How much sugar do you usually add to malted drinks?

126a Sweetened condensed milk

☐

126k Less than 1 tsp

☐

126b Evaporated milk

☐

126l 1-2 tsp/Ask for less

☐

126c Whole milk/powder

☐

126m 3-4 tsp/Ask for regular

☐

126d Low-fat milk/powder

☐

126n 5+ tsp/Ask for more

☐

126e Skimmed milk/powder

☐

126o None

☐

126f Soya milk

☐

126g Creamer/whitener

☐

Is the malted drink usually:

126h Milk is already added (I drink 3-in-1)

☐

126p Packaged

☐

126i Milk is already added (I drink 2-in-1)

☐126q Freshly prepared/  
made up with water☐

126j Do not add milk

☐

How often do you consume one serving of:

Per day Per week Per month Never/Rarely

One serving means:

|     |                                                                                                                                        |  |  |  |                          |                     |
|-----|----------------------------------------------------------------------------------------------------------------------------------------|--|--|--|--------------------------|---------------------|
| 127 | <b>Fruit or vegetable juice</b><br>(100% juice, no added sugar)<br>inc. freshly squeezed or pack                                       |  |  |  | <input type="checkbox"/> | 1 glass/bottle/pack |
| 128 | <b>Fruit or vegetable juice drink,</b><br><b>not 100% juice</b><br>(inc. syrups/cordials with water added)<br>e.g. Ribena, Minute Maid |  |  |  | <input type="checkbox"/> | 1 glass/bottle/pack |
| 129 | <b>Canned/bottled tea</b><br>e.g. lemon/peach tea, milk tea,<br>chrysanthemum tea, jasmine green tea                                   |  |  |  | <input type="checkbox"/> | 1 glass/bottle/can  |
| 130 | <b>Canned/bottled coffee</b> e.g. latte, mocha                                                                                         |  |  |  | <input type="checkbox"/> | 1 bottle/can        |
| 131 | <b>Other non-carbonated sweetened</b><br><b>drinks</b> e.g. sugarcane juice, bandung,<br>waterchestnut drink, barley drink             |  |  |  | <input type="checkbox"/> | 1 glass/bottle/can  |
| 132 | <b>Sports drinks</b><br>e.g. 100 PLUS®, H-Two-O®                                                                                       |  |  |  | <input type="checkbox"/> | 1 glass/bottle/can  |
| 133 | <b>Carbonated soft drinks, sugar free</b><br>e.g. Coke Zero®                                                                           |  |  |  | <input type="checkbox"/> | 1 glass/bottle/can  |
| 134 | <b>Carbonated soft drinks, regular</b><br>e.g. regular cola, Fanta®                                                                    |  |  |  | <input type="checkbox"/> | 1 glass/bottle/can  |
| 135 | <b>Soya milk, low sugar/no sugar added,</b><br><b>inc. flavoured</b> e.g. chocolate, fruit, red<br>bean                                |  |  |  | <input type="checkbox"/> | 1 glass/bottle/pack |

| How often do you consume one serving of: |                                                                                    | Per day | Per week | Per month | Never/Rarely             | One serving means:                        |
|------------------------------------------|------------------------------------------------------------------------------------|---------|----------|-----------|--------------------------|-------------------------------------------|
| 136                                      | <b>Soya milk, not low sugar, inc. flavoured</b><br>e.g. chocolate, fruit, red bean |         |          |           | <input type="checkbox"/> | 1 glass/bottle/pack                       |
| 137                                      | <b>Milkshake</b><br>e.g. chocolate, strawberry, banana                             |         |          |           | <input type="checkbox"/> | 1 glass                                   |
| 138                                      | <b>Yoghurt drink</b> e.g. lassi, Yakult®, Vitagen®                                 |         |          |           | <input type="checkbox"/> | 1 bottle/glass                            |
| 139                                      | <b>Powdered nutrition drink</b> e.g. whey protein shake, Ensure®, Herbalife®       |         |          |           | <input type="checkbox"/> | 1 glass/pack                              |
| 140                                      | <b>Alcoholic beverages</b>                                                         |         |          |           | <input type="checkbox"/> | 1 bottle beer; 1 glass wine; 25ml liqueur |
| 141                                      | <b>Water, plain (inc. bottled)</b>                                                 |         |          |           | <input type="checkbox"/> | 1 glass/bottle                            |

**DAIRY PRODUCTS**

| How often do you consume one serving of: |                                                                                                            | Per day                  | Per week | Per month                | Never/Rarely             | One serving means:     |
|------------------------------------------|------------------------------------------------------------------------------------------------------------|--------------------------|----------|--------------------------|--------------------------|------------------------|
| 142                                      | <b>Milk, non-fat (including on cereal but not in tea/coffee)</b>                                           |                          |          |                          | <input type="checkbox"/> | 1 glass                |
| 143                                      | <b>Milk, low fat (including on cereal but not in tea/coffee) inc. flavoured</b> e.g. chocolate, strawberry |                          |          |                          | <input type="checkbox"/> | 1 glass                |
| 144                                      | <b>Milk, whole (including on cereal but not in tea/coffee) inc. flavoured</b> e.g. chocolate, strawberry   |                          |          |                          | <input type="checkbox"/> | 1 glass                |
| 145                                      | <b>Yoghurt/frozen yoghurt inc. flavoured</b> e.g. greek, chocolate, strawberry                             |                          |          |                          | <input type="checkbox"/> | 1 pot/pack             |
| 145a                                     | Is the yoghurt usually low fat?                                                                            | <input type="checkbox"/> | Yes      | <input type="checkbox"/> | No                       |                        |
| 146                                      | <b>Cheese (inc. cheese spread)</b>                                                                         |                          |          |                          | <input type="checkbox"/> | 1 slice/1 dessertspoon |
| 146a                                     | Is the cheese usually reduced fat?                                                                         | <input type="checkbox"/> | Yes      | <input type="checkbox"/> | No                       |                        |

**SNACKS AND DESSERTS**

| How often do you consume one serving of: |                                                                                                                 | Per day | Per week | Per month | Never/Rarely             | One serving means: |
|------------------------------------------|-----------------------------------------------------------------------------------------------------------------|---------|----------|-----------|--------------------------|--------------------|
| 147                                      | <b>Savoury biscuits</b><br>e.g. cream cracker, rice cracker, pretzel                                            |         |          |           | <input type="checkbox"/> | 2 pieces           |
| 148                                      | <b>Sweet biscuits (no filling)</b> e.g. digestive, marie biscuit, ginger biscuits                               |         |          |           | <input type="checkbox"/> | 2 pieces           |
| 149                                      | <b>Biscuits/cookies, with filling or with chocolate</b><br>e.g. Oreo®, bourbon, Tim Tam®                        |         |          |           | <input type="checkbox"/> | 2 pieces           |
| 150                                      | <b>Pastry</b> e.g. egg tart, pineapple tart, red/green bean pastry, croissant, danish, custard puff, cream puff |         |          |           | <input type="checkbox"/> | 1 piece            |

| How often do you consume one serving of: |                                                                                                                                                     | Per day | Per week | Per month | Never/Rarely             | One serving means: |
|------------------------------------------|-----------------------------------------------------------------------------------------------------------------------------------------------------|---------|----------|-----------|--------------------------|--------------------|
| 151                                      | <b>Sweet snack, deep-fried</b> e.g. pisang goreng, doughnut, you tiao, ham ching peng                                                               |         |          |           | <input type="checkbox"/> | 1 piece            |
| 152                                      | <b>Sweet desserts and kueh</b> e.g. kueh sarlat, kueh talam, kueh ko swee, coconut burfi, putu mayam, ubi kayu, kesari, jelly/agar agar, kuih lapis |         |          |           | <input type="checkbox"/> | 2 pieces           |
| 153                                      | <b>Sweet desserts in soup</b> e.g. bubur cha cha, pulut hitam, chendol, green bean soup, ice kacang, chng tng, payasam (kheer), grass jelly         |         |          |           | <input type="checkbox"/> | 1 bowl             |

How often are the sweet desserts and kueh, and the desserts in soup:

|      |                           |                                       |                                    |                                        |                                 |                                 |
|------|---------------------------|---------------------------------------|------------------------------------|----------------------------------------|---------------------------------|---------------------------------|
| 153a | With coconut/coconut milk | <input type="checkbox"/> Never/Rarely | <input type="checkbox"/> Sometimes | <input type="checkbox"/> Half the time | <input type="checkbox"/> Mostly | <input type="checkbox"/> Always |
|------|---------------------------|---------------------------------------|------------------------------------|----------------------------------------|---------------------------------|---------------------------------|

| How often do you consume one serving of: |                                                                                                                                | Per day | Per week | Per month | Never/Rarely             | One serving means: |
|------------------------------------------|--------------------------------------------------------------------------------------------------------------------------------|---------|----------|-----------|--------------------------|--------------------|
| 154                                      | <b>Beancurd dessert</b> e.g. tau huay, soya pudding                                                                            |         |          |           | <input type="checkbox"/> | 1 medium bowl      |
| 155                                      | <b>Pancake/hotcake/waffle</b> (inc. appam)                                                                                     |         |          |           | <input type="checkbox"/> | 1 piece            |
| 156                                      | <b>Ice cream</b>                                                                                                               |         |          |           | <input type="checkbox"/> | 1 scoop            |
| 157                                      | <b>Cake</b> e.g. plain butter, sponge, fruit, cream cake                                                                       |         |          |           | <input type="checkbox"/> | 1 slice            |
| 158                                      | <b>Chocolate</b>                                                                                                               |         |          |           | <input type="checkbox"/> | 1 50g bar          |
| 159                                      | <b>Seeds</b> e.g. sunflower seeds, sesame seeds                                                                                |         |          |           | <input type="checkbox"/> | 1 dessertspoon     |
| 160                                      | <b>Nuts</b> e.g. peanuts, cashews, almonds                                                                                     |         |          |           | <input type="checkbox"/> | 1 dessertspoon     |
| 161                                      | <b>Puffs and pies</b> e.g. curry puff, chicken pie                                                                             |         |          |           | <input type="checkbox"/> | 1 piece            |
| 162                                      | <b>Dumpling</b> e.g. siew mai, wanton, har gow, gyoza                                                                          |         |          |           | <input type="checkbox"/> | 1 piece            |
| 163                                      | <b>Fried chips and crackers, savoury</b> e.g. potato chips, prawn crackers, papadam, muruku, keropok, rempeyek, tortilla chips |         |          |           | <input type="checkbox"/> | 1 handful          |



## DIETARY PRACTICES QUESTIONS

|                                                                                                                               | Per day | Per week | Per month | Never/Rarely             |
|-------------------------------------------------------------------------------------------------------------------------------|---------|----------|-----------|--------------------------|
| DP1) How often do you eat at hawker centres, foods courts or coffee shops?                                                    |         |          |           | <input type="checkbox"/> |
| DP2) How often do you eat at workplace or school canteens?                                                                    |         |          |           | <input type="checkbox"/> |
| DP3) How often do you eat at western fast food outlets or quick-service restaurants?                                          |         |          |           | <input type="checkbox"/> |
| DP4) How often do you eat at other restaurants?                                                                               |         |          |           | <input type="checkbox"/> |
| DP5) How many servings of fruit do you usually eat (excluding juices)? (1 serving is about 1 apple, 1 banana, 1 papaya wedge) |         |          |           | <input type="checkbox"/> |
| DP6) How many servings of vegetables do you usually eat? (1 serving is about 1 scoop of vegetables)                           |         |          |           | <input type="checkbox"/> |

DP7) What type of tea do you usually consume? (excluding canned/bottled tea) (MAY TICK MULTIPLE OPTIONS)

- Chinese tea/oolong tea ☐
- English tea/black tea ☐
- Green tea ☐
- Herbal tea ☐
- Do not consume tea regularly ☐

DP8) Do you consume 'less sweet' non-carbonated sweetened drinks, e.g. Nutritea® barley?

- Yes ☐
- No ☐

**DP9) At the table, how often do you add salt or sauces to your food?** e.g. soy sauce, braised gravy

Never ☐

Sometimes ☐

Always ☐

**DP10) What type of fat or oil is usually used for cooking at home? (TICK ONE ONLY)**

Butter, dripping, ghee, lard or any other animal fat ☐

Vanaspati (vegetable ghee) ☐

Vegetable oil/blended oil ☐

Palm oil ☐

Coconut oil ☐

Hard margarine ☐

Soft margarine ☐

Corn oil ☐

Soya bean oil ☐

Sunflower oil ☐

Peanut oil ☐

Canola oil ☐

Olive oil ☐

Others (please specify ) \_\_\_\_\_ ☐

Do not eat food cooked at home ☐

**DP11) Do you take vitamins or supplements?**

Yes ☐ → Go to Q 11a)

No ☐ → END OF QUESTIONNAIRE

**DP11a) If yes, please state the name, brand, number, frequency and duration below.**

| Type<br>e.g. Vitamin C, multivitamin | Brand name | Dose/<br>Strength<br>e.g.<br>500mg (if<br>known) | Number<br>of pills/<br>capsules | Frequency                |                            |                             | Length of time taking<br>supplement |                          |                          |
|--------------------------------------|------------|--------------------------------------------------|---------------------------------|--------------------------|----------------------------|-----------------------------|-------------------------------------|--------------------------|--------------------------|
|                                      |            |                                                  |                                 | Every<br>day             | At least<br>once a<br>week | Less than<br>once a<br>week | Less<br>than 1<br>year              | Between<br>1-5 years     | More<br>than 5<br>years  |
| _____                                | _____      | _____                                            | _____                           | <input type="checkbox"/> | <input type="checkbox"/>   | <input type="checkbox"/>    | <input type="checkbox"/>            | <input type="checkbox"/> | <input type="checkbox"/> |
| _____                                | _____      | _____                                            | _____                           | <input type="checkbox"/> | <input type="checkbox"/>   | <input type="checkbox"/>    | <input type="checkbox"/>            | <input type="checkbox"/> | <input type="checkbox"/> |
| _____                                | _____      | _____                                            | _____                           | <input type="checkbox"/> | <input type="checkbox"/>   | <input type="checkbox"/>    | <input type="checkbox"/>            | <input type="checkbox"/> | <input type="checkbox"/> |
| _____                                | _____      | _____                                            | _____                           | <input type="checkbox"/> | <input type="checkbox"/>   | <input type="checkbox"/>    | <input type="checkbox"/>            | <input type="checkbox"/> | <input type="checkbox"/> |
| _____                                | _____      | _____                                            | _____                           | <input type="checkbox"/> | <input type="checkbox"/>   | <input type="checkbox"/>    | <input type="checkbox"/>            | <input type="checkbox"/> | <input type="checkbox"/> |

[END]
